# Supplementary material for: The performance of emerging materials derived from waste organism blood and saponified modified orange peel for immobilization of available Cd in soil
Source: Royal Society of Chemistry journal article supplement (doi:10.1039/d0ra06411d), 2020-01-01
Supplement: d0ra06411d1.pdf [file d0ra06411d1.pdf]

## Supplementary material

**Table A**

Some properties and Cd concentrations in soil samples and the national standard

| Metal/Properties             | Means             | National Application Standard |              |            |
|------------------------------|-------------------|-------------------------------|--------------|------------|
|                              |                   | pH > 7.5                      | pH = 6.5—7.5 | pH < 6.5   |
| Total Cd content             | 10.00 mg/kg       | 0.60 mg/kg                    | 0.30 mg/kg   | 0.30 mg/kg |
| Extracted-Cd (EX-Cd)         | 5.50 mg/kg        | —                             | —            | —          |
| pH (soil: water=1:2.5, w/v)  | 5.53              | —                             | —            | —          |
| Organic Matter (OM)          | 34.58 g/kg        | —                             | —            | —          |
| Electrical Conductivite (EC) | 155.80 $\mu$ s/kg | —                             | —            | —          |
